# Supplementary material
Source: publisher figshare collection journal article supplement (https://acs.figshare.com/ndownloader/files/10108326)
Supplement: Supplementary file 1 [file 10108326]

# Supporting Information for: Fabrication of Supramolecular Chirality from Achiral Molecules at the Liquid/Liquid Interface Studied by Second Harmonic Generation

Lu Lin,<sup>†,‡</sup> Zhen Zhang,<sup>‡</sup> Yuan Guo,<sup>\*,‡,¶</sup> and Minghua Liu<sup>\*,‡</sup>

<sup>†</sup>*National Center for Nanoscience and Technology, Beijing 100190, P. R. China*

<sup>‡</sup>*Beijing National Laboratory for Molecular Sciences, Institute of Chemistry, Chinese  
Academy of Sciences, Beijing 100190, P. R. China*

<sup>¶</sup>*University of Chinese Academy of Sciences, Beijing 100049, P. R. China*

E-mail: guoyuan@iccas.ac.cn; liumh@iccas.ac.cn

## Fresnel Coefficients

In eq 1,  $a_i$  ( $i = 1 - 7$ ) denote the Fresnel coefficients, which can be expressed as:

$$\begin{aligned}
 a_1 &= L_{yy}(2\omega) L_{zz}(\omega) L_{yy}(\omega) \sin \beta \\
 a_2 &= -2L_{xx}(2\omega) L_{zz}(\omega) L_{xx}(\omega) \cos^2 \beta \sin \beta \\
 a_3 &= L_{zz}(2\omega) L_{xx}(\omega) L_{xx}(\omega) \cos^2 \beta \sin \beta \\
 a_4 &= L_{zz}(2\omega) L_{zz}(\omega) L_{zz}(\omega) \sin^3 \beta \\
 a_5 &= L_{zz}(2\omega) L_{yy}(\omega) L_{yy}(\omega) \sin \beta \\
 a_6 &= 2L_{xx}(2\omega) L_{zz}(\omega) L_{yy}(\omega) \cos \beta \sin \beta \\
 a_7 &= 2L_{yy}(2\omega) L_{zz}(\omega) L_{xx}(\omega) \cos \beta \sin \beta
 \end{aligned} \tag{1}$$

with

$$\begin{aligned}
 L_{xx}(\omega_i) &= \frac{2n_1(\omega_i) \cos \gamma}{n_1(\omega_i) \cos \gamma + n_2(\omega_i) \cos \beta} \\
 L_{yy}(\omega_i) &= \frac{2n_1(\omega_i) \cos \beta}{n_1(\omega_i) \cos \beta + n_2(\omega_i) \cos \gamma} \\
 L_{zz}(\omega_i) &= \frac{2n_2(\omega_i) \cos \beta}{n_1(\omega_i) \cos \gamma + n_2(\omega_i) \cos \beta} \left( \frac{n_1(\omega_i)}{n'(\omega_i)} \right)^2
 \end{aligned} \tag{2}$$

In the above equations,  $n_1$  and  $n_2$  are the refractive indices of water and organic phase,  $n'$  is the refractive index of the interfacial layer,  $\beta$  is the incident angle, and  $\gamma$  is the refracted angle. Here we choose  $n_1(\omega) = 1.329$ ,  $n_1(2\omega) = 1.339$  and  $n_2(\omega) = n_2(2\omega) = 1.445$ . According to Zhuang *et al.* (Phys. Rev. B 1999, 59, 12632),  $n' = n_1 \sqrt{\frac{n_2^2(n_2^2+5)}{4n_2^2+2}}$ .

## Calculation of the Orientational Angle

The tensor elements  $\chi_{zzz}$ ,  $\chi_{zxx}$ ,  $\chi_{xxz}$  and  $\chi_{yxx}$  can be obtained by fitting the SHG curves. The fitting results are listed in Table S1.

We use  $\chi_{zzz}$ ,  $\chi_{zxx}$  and  $\chi_{xxz}$  to calculate the orientational angle. By assuming  $\beta_{caa} = 0$ ,

Table 1: Fitting results of the tensor elements.

| Concentration (mM) | $\chi_{zzz}$ | $\chi_{zxx}$ | $\chi_{xxz}$ | $\chi_{yxz}$ |
|--------------------|--------------|--------------|--------------|--------------|
| 0.005              | 123.84       | 25.05        | 24.84        | 0.01         |
| 0.010              | 140.11       | 31.74        | 31.45        | 0.09         |
| 0.025              | 243.33       | 61.98        | 57.85        | 0.91         |
| 0.035              | 312.64       | 87.68        | 81.42        | 2.88         |
| 0.060              | 369.98       | 91.36        | 83.90        | 2.56         |
| 0.075              | 565.86       | 109.30       | 102.86       | 1.88         |
| 0.100              | 682.75       | 122.00       | 113.74       | 1.03         |
| 0.150              | 721.19       | 126.58       | 116.89       | 0.37         |
| 0.300              | 782.09       | 130.60       | 126.99       | 0.32         |

$\chi_{zxx}$  should be equal to  $\chi_{xxz}$ . As shown in Table S1, the values of  $\chi_{zxx}$  are close to that of  $\chi_{xxz}$ . Therefore, it is reasonable to neglect  $\beta_{caa}$  for calculating the orientational angle. To minimize the error, we suppose:

$$\frac{\chi_{zzz}}{\chi_{zzz} + \chi_{zxx} + \chi_{xxz}} \approx \frac{\langle \cos^3 \theta \rangle}{\langle \cos^3 \theta \rangle + \langle \sin^2 \theta \cos \theta \rangle} \quad (3)$$

Assuming  $\theta$  has a very narrow distribution, we have:

$$\theta = \arccos \left( \sqrt{\frac{\chi_{zzz}}{\chi_{zzz} + \chi_{zxx} + \chi_{xxz}}} \right) \quad (4)$$

We shall assess the error of the calculation. By assuming a narrow distribution of  $\theta$ , we have:

$$\frac{\chi_{zzz}}{\chi_{zzz} + \chi_{zxx} + \chi_{xxz}} = \frac{\cos^2 \theta + \frac{\beta_{caa}}{\beta_{ccc}} \sin^2 \theta \langle \cos^2 \psi \rangle}{1 + \frac{\beta_{caa}}{2\beta_{ccc}}} \quad (5)$$

The ratio of  $\beta_{caa}$  and  $\beta_{ccc}$  can be estimated as:

$$\frac{\beta_{caa}}{\beta_{ccc}} \approx \frac{\chi_{zxx} - \chi_{xxz}}{(\chi_{zxx} + \chi_{xxz}) \sin^2 \theta} \leq 0.15 \quad (6)$$

At lower concentrations,  $\psi$  is randomly distributed. With increasing concentration,  $\psi$  approaches zero. It is thus reasonable to suggest  $\frac{1}{2} \leq \langle \cos^2 \psi \rangle \leq 1$ . Let  $\theta = 33^\circ$ , then the

calculated value for  $\theta$  lies between  $33.4^\circ$  and  $34.7^\circ$ . Therefore, the error of the calculated orientation is less than  $2^\circ$ .

## Langmuir Fitting of Adsorption

According to the Langmuir adsorption model, we have

$$\frac{\chi_{zzz}}{\cos^3\theta} \approx N_s \beta_{ccc} = A \frac{Kc}{1 + Kc} \quad (7)$$

where  $c$  is the bulk concentration,  $A$  and  $K$  are constants. The values of  $A$  and  $K$  can be obtained by fitting. Then the coverage can be calculated as  $\frac{\chi_{zzz}}{A \cos^3\theta}$ .
